# Supplementary material for: Fairly flexible: brown-tufted capuchins and a squirrel monkey adjust their motor responses in a foraging task
Source: PeerJ. 2025 Mar 12;13:e19023. doi: 10.7717/peerj.19023 (PMC11910149; doi:10.7717/peerj.19023)
Supplement: Supplemental Information 4 — The rod pulling sequences for unsuccessful subjects in phase 1 (Table S1) and unsuccessful subjects in phase 2 (Table S2) are also available. [file peerj-13-19023-s004.xlsx]

## Sheet: Table 2
Trial	Capuchins																	Sq M
	De	Dv	Mt	Ng	Nk	Nl	Nm	Nr	Nt	Nv	Nw	Ny	Sd	Sg	Sn	St	Sv	Gw
1	1,4,3,2	5,4,3,2,1	5,4,3,2,1	5,4,3,2,1	3,4,2,1	4,5,3,1,2	3,4,2,1	5,4,3,2,1	5,4,3,2,1	4,1,3,5,2	4,3,2,1	4,3,5,2,1	1,3,4,2	5,2,1,3,4	5,4,3,2,1	1,3,4,5,2	4,2,3,1	5,4,2,3,1
2	3,2,4,1	4,3,2,1		4,2,3,1	4,3,2,1	3,4,2,5,1	4,3,2,1	4,3,5,2,1	4,3,5,2,1	5,3,4,2,1	4,3,1,5,2	5,4,3,2,1	4,3,2,1	5,4,3,2,1		5,4,3,2,1	4,3,2,1
3	4,3,2,1		4,3,2,1	4,3,1,2	4,2,1,3	1,4,5,3,2	3,4,2,1	5,4,3,2,1	4,3,2,5,1	4,5,3,2,1	4,3,2,1	2,4,3,1		4,5,3,2,1		4,5,3,2,1	4,2,3,5,1
4			5,4,3,2,1	4,3,2,1	4,3,2,1	4,3,1,2	5,4,3,2,1	5,2,4,3,1	4,3,2,1	5,4,3,2,1		4,3,2,1	4,1,3,2	5,4,3,2,1		4,3,2,1	5,3,2,4,1	5,4,1,2,3
5		5,4,3,2,1		4,1,3,2		5,4,1,3,2	4,2,3,1	4,3,2,1			4,2,3,1		3,4,5,1,2		5,1,4,3,2	3,4,2,1	4,2,3,1	5,3,2,4,1
6	4,3,1,2	4,3,2,1	4,5,3,2,1	4,3,2,1	3,2,4,1	5,4,2,3,1	2,1,5,4,3	4,2,3,1	5,4,3,2,1	4,5,3,2,1	4,3,2,1	1,5,4,3,2	2,1,4,5,3		4,3,2,1	4,3,2,1	5,4,2,3,1	5,2,4,3,1
7	4,3,2,1	5,4,3,2,1	2,4,1,5,3	4,3,1,2	4,3,2,1	3,2,4,1	5,4,3,2,1	5,4,3,2,1		4,2,3,1	2,4,1,3	4,3,2,1	4,3,1,2	5,4,3,1,2	5,4,3,2,1	1,4,3,2	4,3,2,1	5,4,2,3,1
8		4,3,2,1	4,3,2,1	4,1,3,2		4,2,3,1	4,3,2,1	4,3,2,1	4,3,2,1	4,1,3,2	4,3,2,1		4,3,5,2,1	4,2,3,1	5,2,4,1,3	4,3,2,1	4,3,1,2	5,4,3,1,2
9		3,4,2,1	5,4,3,2,1	4,3,2,1		4,3,1,5,2	3,4,2,1	5,4,3,2,1		4,3,2,1			4,3,2,1	3,4,2,1	5,4,3,2,1		2,3,4,1	3,5,4,2,1
10		4,3,2,1	4,3,2,1	3,1,4,2	4,2,1,3	4,3,5,2,1	1,4,3,2	4,3,2,1	5,4,3,2,1	4,2,1,3		5,4,3,2,1		4,3,2,1		3,4,2,1	5,4,3,2,1	4,3,2,1
11		5,4,3,2,1			4,1,3,2	2,4,1,5,3	3,2,5,4,1	5,4,3,2,1	4,3,2,1	4,2,3,1		4,3,2,1	5,4,3,2,1	4,5,3,2,1		4,3,2,1	4,3,2,1	3,2,4,1
12		4,3,2,1		1,3,2,4	4,3,2,1	5,3,4,2,1	5,4,3,2,1	4,3,2,1			4,3,5,2,1		4,3,2,1	4,3,2,1			4,2,1,3	3,4,1,2
13		4,3,1,2	5,4,3,2,1	4,3,2,1		4,3,2,1	4,3,2,1		5,4,3,2,1		4,3,2,1				5,4,3,1,2		4,3,2,5,1	3,5,2,1,4
14			4,3,2,1		5,4,3,2,1	3,4,2,1			4,3,2,1	4,3,2,1					5,4,3,2,1		4,3,2,1	4,3,5,2,1
15		4,3,2,1	5,4,3,2,1		4,3,2,1	2,4,3,1	1,5,4,3,2		5,4,3,2,1	4,2,3,1								2,3,4,1
16			4,3,2,1			4,5,1,3,2	4,3,2,1	4,3,2,5,1	4,2,1,3	4,3,1,2		5,4,3,2,1						4,3,1,2
17						5,4,3,2,1		5,4,3,2,1	3,2,1,4	4,3,2,1	4,3,1,2	4,3,2,1	4,2,1,3	5,4,3,2,1			5,4,3,2,1	1,5,4,2,3
18		5,4,3,2,1	5,4,3,2,1		3,4,2,1	4,3,2,1	5,4,3,2,1	4,3,2,1	4,3,2,1	4,3,1,2	4,3,2,1	5,4,3,2,1	1,4,2,3	4,3,2,1	4,3,2,1		4,5,3,2,1	5,4,2,3,1
19		4,3,2,1			4,3,2,1	4,3,2,5,1	4,3,2,1	5,4,3,2,1	5,4,3,2,1	4,3,2,1	4,2,3,1		4,1,2,3				5,4,3,2,1	1,3,2,4
20			4,3,2,1			4,3,1,2	1,3,2,4	4,3,2,1	5,1,4,3,2	5,4,3,1,2		4,3,2,1	4,3,2,1	1,3,5,4,2			4,3,2,1	3,5,4,1,2
21						4,3,2,1	4,3,2,1	5,4,3,2,1	5,4,3,2,1					4,3,2,1				3,4,2,1
22						4,3,2,5,1	5,4,3,2,1		4,5,3,2,1			5,4,3,2,1	4,3,1,2					3,1,2,4
23						4,2,3,1		4,3,2,1	4,3,2,1			4,3,2,1	4,1,3,2				4,3,2,5,1	2,1,3,4
24						4,3,2,5,1	4,3,2,1		5,4,3,2,1				4,3,2,1				4,3,2,1	5,4,3,2,1
25						4,3,2,1	1,3,5,4,2	5,4,3,2,1							4,5,3,2,1			2,1,3,4
26						4,3,5,2,1	4,5,3,2,1		4,3,2,1				4,3,1,2		4,1,3,2			1,3,4,2
27						5,1,4,2,3	5,4,3,2,1	4,3,2,1	5,4,3,2,1				4,3,2,1		4,3,2,1			3,2,4,1
28						4,3,2,1			4,3,2,1			5,4,3,2,1					5,4,3,2,1
29						4,3,5,2,1			5,4,3,2,1			4,3,2,1			1,4,5,3,2		4,3,5,2,1
30			5,4,3,2,1			5,4,3,2,1		5,4,3,2,1	4,3,2,1						1,4,2,3		4,3,2,1
31			4,3,2,1			3,2,4,1			5,4,3,2,1
32			5,4,3,2,1			3,4,2,1		4,3,2,1	4,3,2,1
33			4,3,2,1			4,5,3,1,2		5,4,3,2,1
34						5,2,4,3,1											3,5,4,2,1
35						4,3,2,1											3,4,2,1
36						5,2,1,4,3			5,4,3,2,1								5,4,3,2,1
37			5,4,3,2,1			4,1,3,2											4,5,3,2,1
38			4,2,3,1			4,2,3,1	4,3,2,1		4,3,2,1								4,3,2,1
39						4,5,1,3,2	5,4,3,2,1	4,3,2,1
40						4,3,2,1	1,4,3,2	5,4,3,2,1
41							5,4,3,2,1		5,4,3,2,1
42						4,2,1,3		4,2,3,1
43						5,2,1,3,4		5,4,3,2,1
44						4,3,2,1
45						5,2,3,4,1	4,3,2,1		4,3,2,1
46						4,2,1,3	5,4,3,2,1		5,4,3,2,1
47						4,3,2,1		4,3,5,2,1
48						5,4,2,3,1	1,5,4,3,2	5,4,3,2,1
49						5,2,3,1,4	4,3,2,1	4,3,2,1	4,3,2,1
50						4,3,2,1	2,1,4,3		5,4,3,2,1
51						4,5,3,1,2	5,4,3,2,1	5,3,4,2,1	4,3,2,1
52						3,1,2,4	4,3,2,1	4,3,2,1
53						4,3,2,1	5,4,3,2,1		4,5,3,2,1
54							4,3,2,1		5,4,3,2,1
55						5,4,3,1,2	5,4,3,2,1	4,5,3,2,1	5,4,3,1,2
56						4,3,2,1		4,3,2,1	4,3,2,1
57						3,4,2,1	3,1,2,4	5,4,3,2,1
58						4,3,2,1	4,1,3,2	2,4,3,1
59						5,4,3,2,1	4,3,2,1	4,3,2,1
60						4,5,3,2,1	2,4,3,1
61						2,4,5,3,1	5,4,3,2,1	5,4,3,2,1
62						4,3,2,1	4,3,2,1	4,3,2,1
63						4,3,1,2
64						4,3,2,1
65						4,2,3,1	2,4,3,1	1,3,5,4,2
66						3,4,2,1	4,3,2,1	4,3,2,1
67						4,1,3,2		1,2,4,3
68						3,4,2,1	5,4,3,2,1	4,3,2,1
69						4,1,3,2	4,3,2,1
70						4,1,2,3
71						5,4,1,2,3		5,4,3,2,1

## Sheet: Table 3
	Capuchins																	SqM
	De	Ng	Nk	Nl	Nm	Nr	Nt	Nv	Nw	Ny	Sd	Sg	Sn	St	Sv	Dvd	Mtd	Gw
1	2,1	2,1	2,1	2,1	2,1	3,2,1	2,1	2,1	2,1	2,1	4,3,2,1a	2,1	2,1	2,1	2,1	5,3,2,1	3,2,1	1,2
2				4,3,2,1						5,2,1	3,2,1a						2,3,1
3	1,2			2,1		2,1				4,3,2,1					3,4,2,1		2,1
4	2,1									2,1					1,2	4,2,1	5,4,3,2,1
5										1,2					2,1	4,3,2,1	2,3,1	2,1
6						3,2,1				2,1	2,1					3,2,1		1,2
7						2,1										4,2,1	3,2,1	2,1
8			3,2,1												1,2	3,2,1	2,1	1,2
9			2,1	4,3,2,1											2,1	5,3,2,1	3,2,1
10			3,2,1	1,2										-c		4,2,1	2,1
11			2,1	2,1										2,1		3,2,1	4,3,2,1
12					1,2			3,2,1			2,3,1					4,3,2,1	3,2,4,1
13	1,2				2,1			2,1			2,1	5,2,1				3,2,1	2,1
14	2,1											2,1				4,3,2,1	2,3,1	2,1
15																3,2,1	3,2,1	1,2
16	1,2				1,2								3,2,1			2,1
17	2,1		3,2,1										2,1			3,2,1	2,1
18					-b										3,2,1	2,1	2,3,1	2,1
19			2,1	1,2	2,1										2,1	5,3,2,1	2,1	1,2
20															3,2,1	4,3,2,1
Median run length	3	20	6	6	2.5	8.5	20	9.5	20	15	6	9.5	9.5	19	3	1	1	3.5
Longest run length	9	20	7	8	11	14	20	11	20	15	8	12	15	19	9	3	2	6

## Sheet: Table S1
Trial	Capuchin	Squirrel Monkeys
	Nb	Ar	Co	Ec	Vi
1	5,4,3,2,1	5,4,3,2,1	5,3,2,4,1	5,4,3,2,1	5,4,3,2,1
2	4,3,5,2,1		5,4,3,2,1	5,4,1,3,2
3	3,4,5,2,1	5,3,4,2,1		5,3,4,1,2
4	3,4,2,1	5,1,4,3,2	3,5,4,2,1	4,5,3,2,1
5	3,5,4,1,2	5,2,4,3,1	5,4,2,3,1		5,4,1,3,2
6	4,2,1,3	5,4,3,2,1	4,5,3,2,1	1,5,2,3,4	5,4,3,1,2
7	3,4,2,1		4,3,5,2,1	1,2,3,4	3,2,5,4,1
8	4,5,2,3,1	4,3,2,1	5,4,3,2,1	1,2,3,5,4	5,4,3,2,1
9	4,2,3,1				5,1,4,3,2
10			5,4,1,2,3		3,5,4,2,1
11	4,5,3,2,1	5,4,3,2,1	5,4,3,2,1	1,2,5,3,4	5,4,3,2,1
12		1,4,3,2	2,1,3,5,4	5,4,3,1,2
13	5,3,4,2,1	5,4,3,2,1	3,5,4,2,1	1,5,2,4,3
14	4,5,3,2,1	4,5,3,2,1	5,3,2,1,4	4,5,1,3,2	4,3,5,2,1
15	5,4,3,2,1	5,4,3,2,1	5,4,3,2,1	1,5,2,4,3	5,4,3,2,1
16		5,4,2,3,1	5,4,2,3,1	3,4,5,1,2
17	4,5,3,2,1	4,5,3,2,1		3,5,4,2,1
18		5,4,3,2,1		5,4,3,2,1
19	4,3,2,1	4,3,2,5,1	3,5,2,4,1	4,3,2,1
20	4,3,5,2,1	4,3,2,1	5,4,3,2,1	5,3,4,2,1
21	5,4,3,2,1	5,4,3,2,1	5,4,3,1,2	5,4,3,2,1
22		4,3,5,2,1	5,4,3,2,1	5,4,3,1,2
23		4,3,2,1	1,5,4,3,2	5,4,3,2,1
24		4,5,3,2,1	4,5,1,3,2	4,1,5,2,3
25	4,5,3,2,1	5,4,3,2,1	5,4,3,1,2	1,5,4,2,3
26	5,4,3,2,1	4,3,2,1	3,5,4,2,1	4,5,3,2,1
27				4,3,5,2,1
28			5,4,3,2,1	4,3,2,5,1
29		5,4,3,2,1		5,4,3,2,1
30
31	4,3,2,1	4,5,3,2,1
32		5,4,3,2,1
33
34	5,4,3,2,1			5,4,3,1,2
35				5,4,3,2,1
36
37		4,3,2,1	4,5,3,2,1
38		5,4,3,2,1
39			5,4,3,2,1	4,3,2,1
40				5,4,3,2,1
41
42	4,5,3,2,1
43	5,4,3,2,1		5,4,2,3,1
44	5,4,3,2,1		5,4,3,2,1
45
46			5,4,1,3,2
47			4,5,3,2,1
48			5,4,3,2,1
49				4,3,2,1
50	4,3,2,1
51	5,4,3,2,1	4,3,5,2,1	3,5,4,2,1
52		5,4,3,2,1	5,4,3,2,1
53	4,3,5,2,1		4,5,3,2,1	4,2,5,3,1
54	5,4,3,2,1		3,5,4,2,1	4,3,1,2
55		5,1,4,3,2	4,3,5,2,1	4,2,3,1
56		5,4,3,2,1	5,4,3,2,1	5,4,3,2,1
57		4,5,3,2,1
58		5,4,3,2,1		3,2,1,5,4
59				4,3,2,1
60
61				5,4,3,2,1
62
63			1,5,4,3,2
64	4,3,2,1		5,4,3,2,1
65	4,5,3,2,1	3,2,5,4,1	4,5,3,2,1
66	5,4,3,2,1	4,3,2,1	2,5,4,1,3	3,5,2,4,1
67		5,4,3,2,1	5,4,3,2,1	3,2,4,1
68			3,2,5,1,4	5,2,1,4,3
69		4,2,3,1	5,4,3,2,1	5,4,3,2,1
70	4,3,5,2,1	5,4,3,2,1		4,3,2,1
71	5,4,3,2,1	4,3,2,1	4,5,3,2,1	5,4,3,2,1
72		4,5,3,2,1	5,4,3,2,1
73		5,4,3,2,1	3,5,4,2,1
74	4,3,5,2,1		5,4,3,2,1
75	5,4,3,2,1
76		5,1,4,3,2
77		5,4,3,2,1
78		5,4,3,1,2	4,3,2,1
79		4,3,1,2	5,4,3,2,1	5,3,2,1,4
80	4,5,3,2,1			5,4,3,2,1
81	5,4,3,2,1	4,3,2,1
82			1,5,4,3,2	5,1,4,3,2
83		5,4,3,2,1	5,4,3,2,1	5,4,3,2,1
84	4,5,3,2,1	3,2,1,4	4,1,2,3
85	5,4,3,2,1	5,4,3,2,1	5,3,4,2,1
86		5,3,2,4,1	4,2,3,1	1,5,2,4,3
87		5,4,2,1,3	2,3,5,4,1	5,4,3,2,1
88		5,3,4,2,1	5,4,3,2,1
89	4,5,3,2,1	4,3,1,2	2,1,5,4,3
90	5,4,3,2,1	5,4,3,2,1	5,4,3,2,1
91		5,4,3,1,2		5,4,3,1,2
92		4,1,2,3	5,4,1,3,2	5,4,3,2,1
93		5,4,3,2,1	4,1,5,3,2
94	4,5,3,2,1	5,3,2,1,4	4,3,2,1
95		4,3,2,1	1,5,4,3,2
96	5,4,3,2,1	4,2,1,3	4,2,3,1
97		5,4,3,2,1
98	4,5,3,2,1	3,2,4,1	4,3,2,1
99		5,4,3,2,1	3,2,1,4
100			3,2,4,1
101			3,2,1,5,4
102			4,3,2,1
103			3,5,2,4,1
104		5,3,4,2,1	3,2,1,5,4
105		5,4,3,1,2	2,1,5,4,3
106		5,4,3,2,1	5,3,2,4,1
107			2,3,1,5,4
108			5,4,3,2,1
109		4,3,2,1	5,2,4,3,1
110		5,4,1,3,2	5,4,3,2,1
111		5,4,3,2,1	4,3,5,2,1
112		4,3,2,1	2,5,4,3,1
113		5,4,3,2,1	2,1,5,4,3
114		5,4,1,3,2	5,4,3,2,1
115		4,3,2,1
116		5,4,3,2,1	3,2,5,4,1
117
118			5,4,1,3,2
119			5,2,4,3,1
120			2,5,4,3,1
121		4,3,1,2	3,2,1,5,4
122			1,3,5,4,2

## Sheet: Table S2
Trial	Dv	Mt
1	5,3,2,1	3,2,1
2		2,3,1
3		2,1
4	4,2,1	5,4,3,2,1
5	4,3,2,1	2,3,1
6	3,2,1
7	4,2,1	3,2,1
8	3,2,1	2,1
9	5,3,2,1	3,2,1
10	4,2,1	2,1
11	3,2,1	4,3,2,1
12	4,3,2,1	3,2,4,1
13	3,2,1	2,1
14	4,3,2,1	2,3,1
15	3,2,1	3,2,1
16	2,1
17	3,2,1	2,1
18	2,1	2,3,1
19	5,3,2,1	2,1
20	4,3,2,1
21		4,5,3,2,1
22		2,3,1
23	2,1	3,2,1
24		2,1
25	5,3,2,1
26	3,2,1
27	5,4,3,2,1	1,3,2
28	5,3,2,1	2,1
29	4,3,2,1
30	5,3,2,1	3,2,1
31	3,2,1
32	5,4,3,2,1	2,1
33	5,3,2,1	3,2,1
34	3,2,1	2,1
35	5,3,2,1
36	3,2,1	3,2,1
37	5,3,2,1	2,1
38
39
40
41	2,1	2,3,1
42	5,3,2,1	2,1
43	5,4,3,2,1	3,2,1
44	4,2,1	2,1
45	4,3,2,1	3,2,1
46	5,4,3,2,1	2,1
47
48	4,2,1
49	4,3,2,1
50		3,2,1
